# Supplementary material
Source: PubMed Central journal article supplement (PMC2882179)

# Supporting Information for “Synthesis of a Water-soluble 1,3-*bis*(diphenylene)-2-phenylallyl (BDPA) Radical”

*Eric L. Dane and Timothy M. Swager\**

*Massachusetts Institute of Technology, 77 Massachusetts Ave. Cambridge, MA 02139*

*\*tswager@mit.edu*

## TABLE OF CONTENTS

---

|                                |     |
|--------------------------------|-----|
| Materials                      | S2  |
| WS-BDPA 9 GHz EPR Simulation   | S2  |
| Compound 2 <sup>1</sup> H-NMR  | S3  |
| Compound 2 <sup>13</sup> C-NMR | S4  |
| Compound 3 <sup>1</sup> H-NMR  | S5  |
| Compound 3 g-COSY 2D-NMR       | S6  |
| Compound 3 <sup>13</sup> C-NMR | S9  |
| Compound 4 <sup>1</sup> H-NMR  | S10 |
| Compound 4 g-COSY 2D-NMR       | S12 |
| Compound 4 <sup>13</sup> C-NMR | S13 |
| WS-BDPA <sup>1</sup> H-NMR     | S14 |

## Materials.

All chemicals, reagents, and solvents were used as received from commercial sources without further purification except dimethylacetamide, dimethylformamide, and dimethylsulfoxide, which were dried over oven-activated 4-Å molecular sieves.

## WS-BDPA 9 GHz EPR Simulation

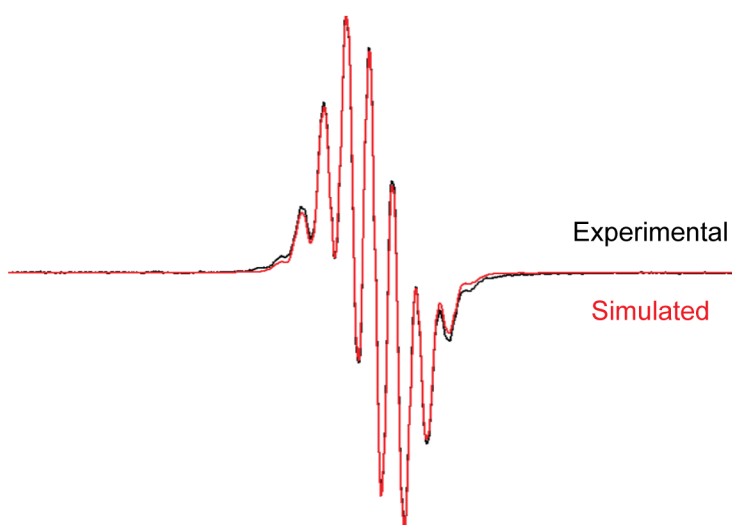

### *Experimental Parameters*

[WS-BDPA] = 10 mM in 3:2 glycerol/water, rt, 2 mW, modulation amplitude 10 mT.

### *Simulation Parameters*

Simulated using WinSim<sup>a</sup> as a single radical with hyperfine couplings with 8 protons. (A1 = 1.986, A2 = 1.725, A3 = 1.894, A4 = 2.24, A5 = 1.717, A6 = 1.633, A7 = 2.164, A8 = 2.019).

<sup>a</sup> Duling, D. R. *J. Magn. Reson., Series B* **1994**, *104*, 105.

Compound 2 <sup>1</sup>H-NMR

CD<sub>2</sub>Cl<sub>2</sub>, 500 MHz

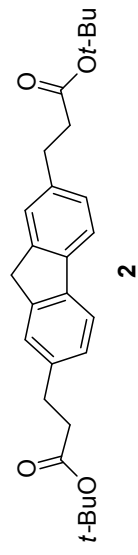

7.65  
7.63  
7.36  
7.19  
7.19  
7.19  
7.18  
7.18  
7.17

3.82

2.95  
2.94  
2.92  
2.55  
2.54  
2.52

1.39

2.00  
1.89  
2.07

2.18

4.16

4.24

17.49

Compound 2 <sup>13</sup>C-NMR

CD<sub>2</sub>Cl<sub>2</sub>, 126 MHz

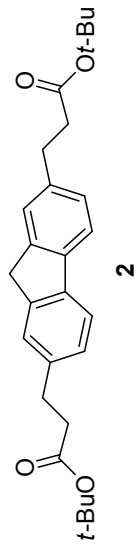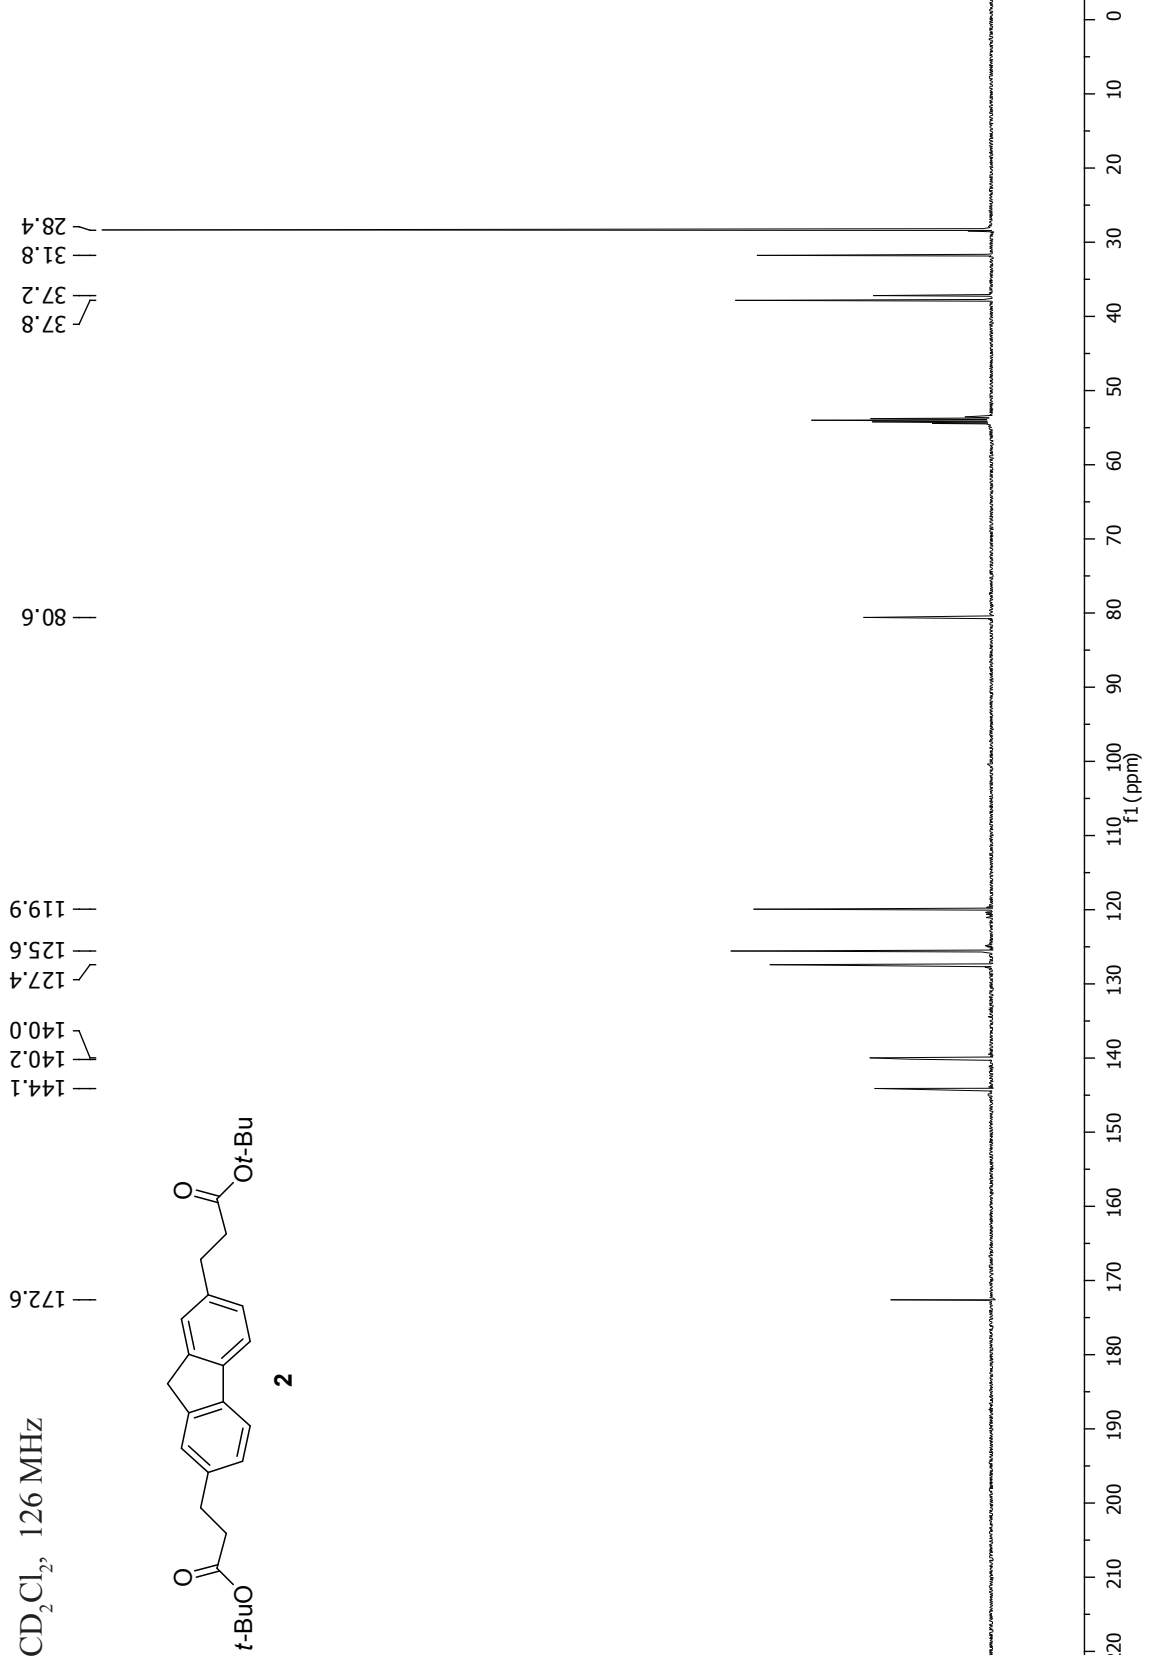

Compound 3 <sup>1</sup>H-NMR

CD<sub>2</sub>Cl<sub>2</sub>, 500 MHz

1.30  
1.35

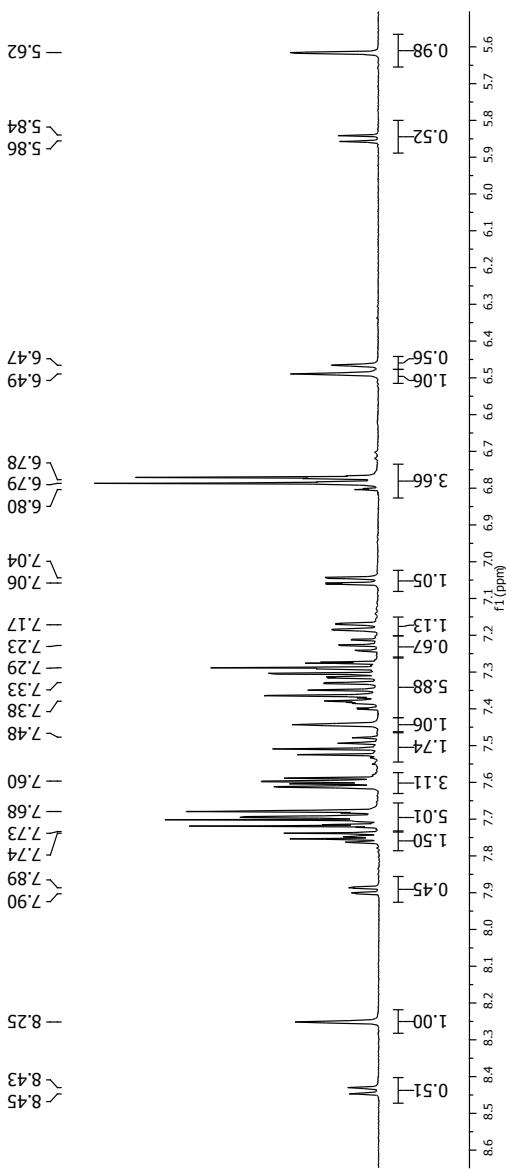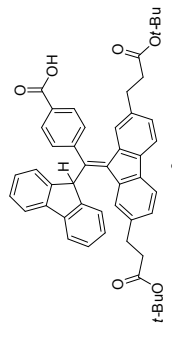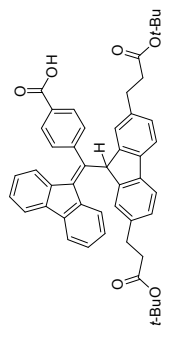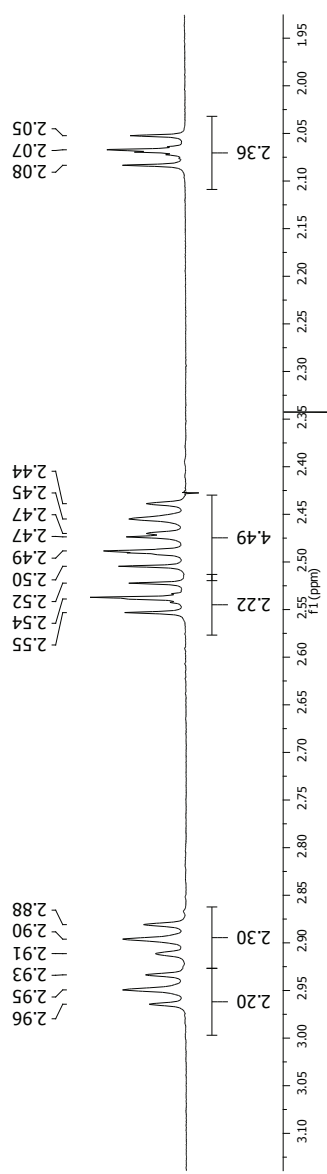

19.06  
9.04

1.00

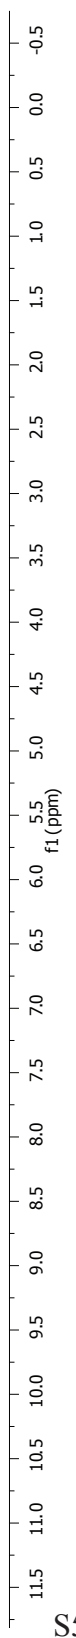

Compound 3 g-COSY 2D-NMR

CD<sub>2</sub>Cl<sub>2</sub>, 500 MHz

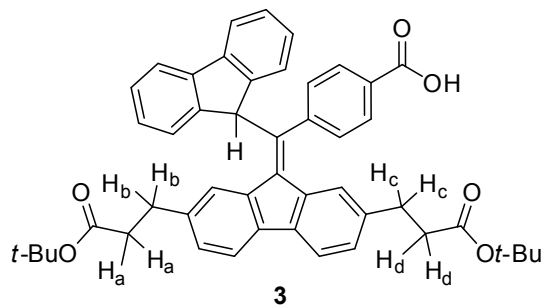

Integration of 1H = 1.00

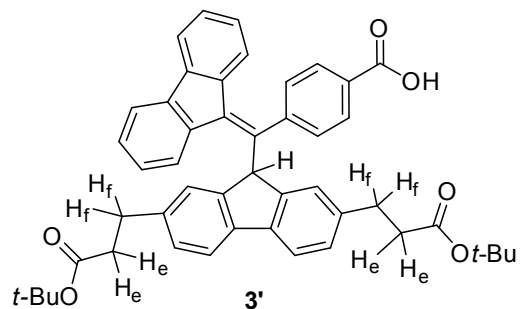

Integration of 1H = 0.50

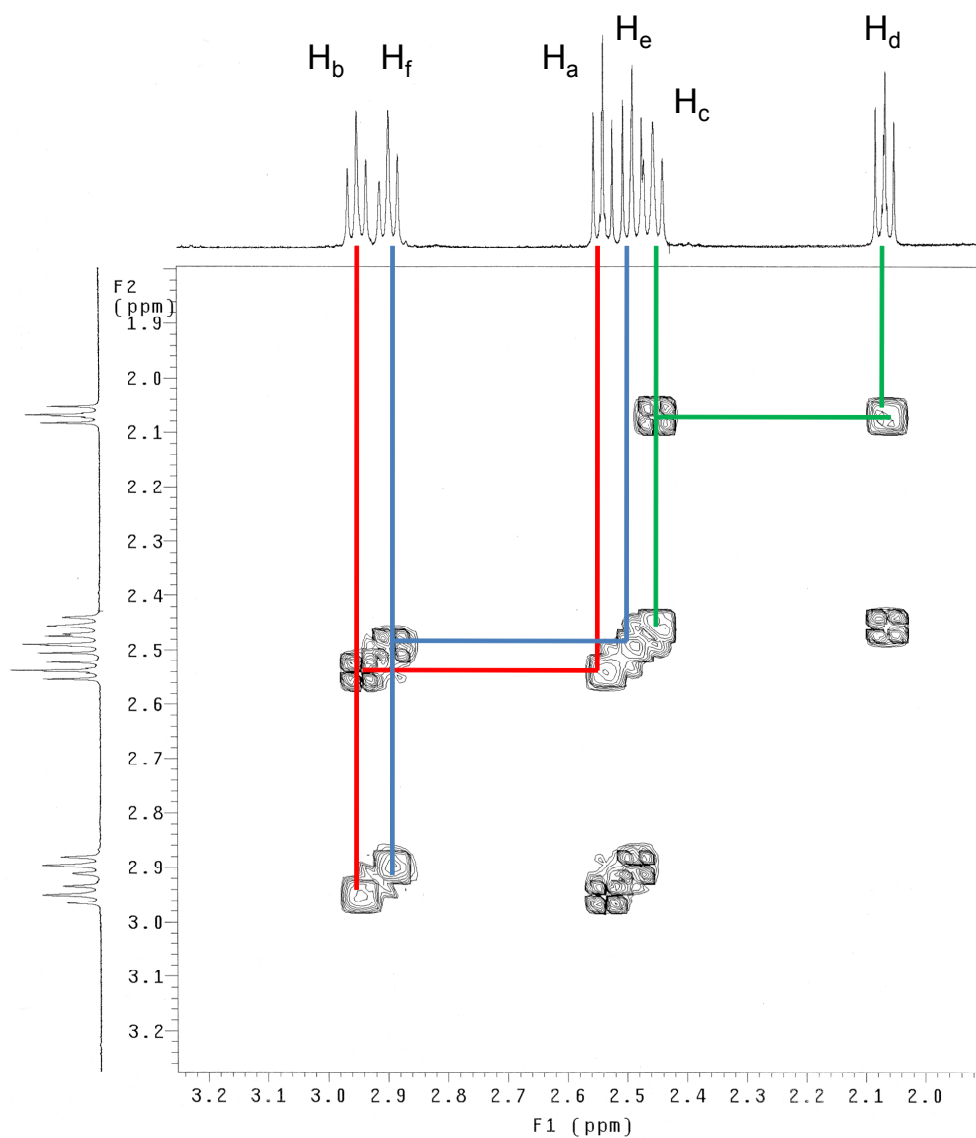

Compound 3 g-COSY 2D-NMR

CD<sub>2</sub>Cl<sub>2</sub>, 500 MHz

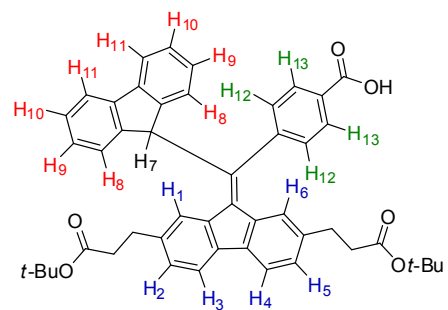

Integration of 1H = 1.00

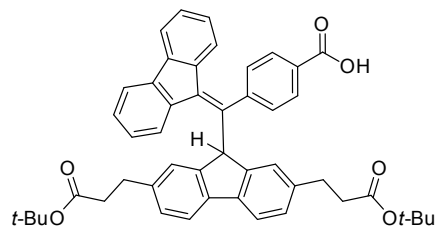

Integration of 1H = 0.50

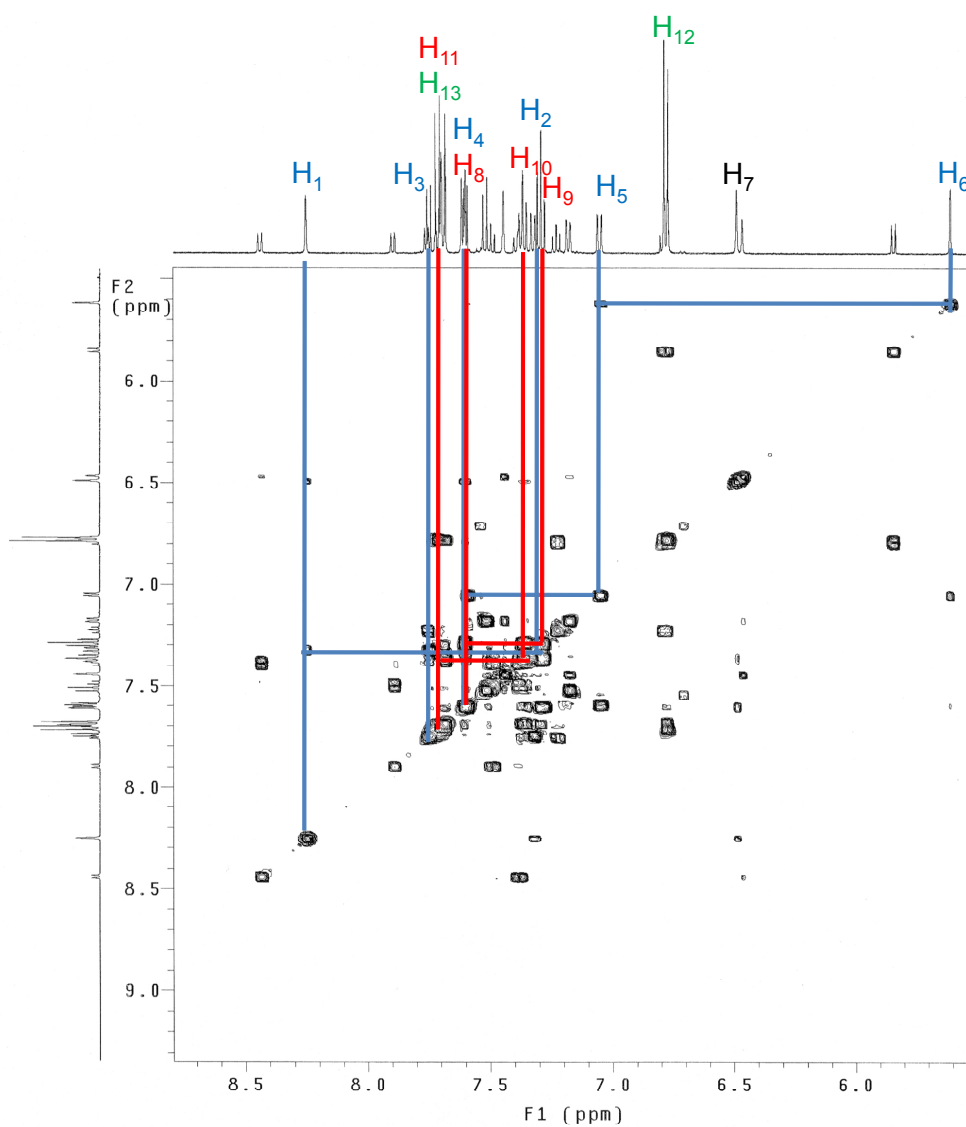

Compound 3 g-COSY 2D-NMR  
CD<sub>2</sub>Cl<sub>2</sub>, 500 MHz

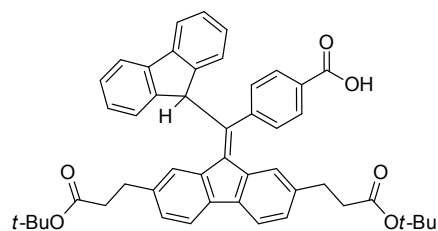

3

Integration of 1H = 1.00

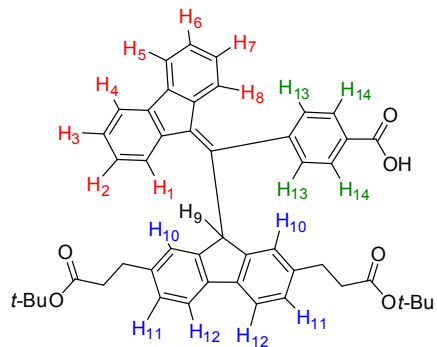

3'

Integration of 1H = 0.50

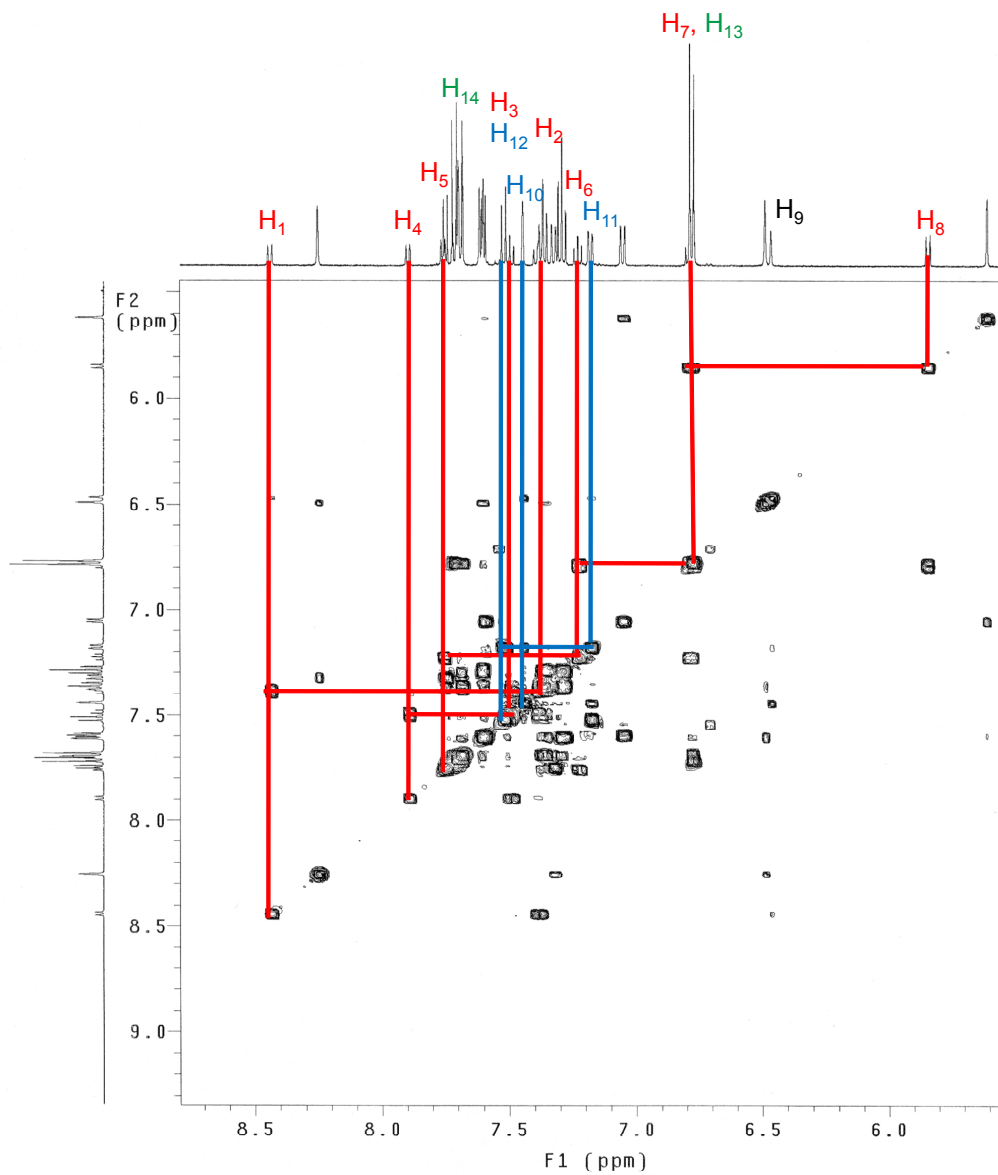



# Compound 3 <sup>13</sup>C-NMR

CD<sub>2</sub>Cl<sub>2</sub>, 126 MHz

52.8  
52.7  
37.8  
37.8  
36.7  
32.1  
31.7  
31.6  
28.3  
28.2

145.2  
144.9  
144.6  
144.4  
144.0  
143.5  
142.5  
141.8  
140.7  
140.4  
140.0  
139.4  
139.3  
139.0  
138.5  
136.7  
136.6  
130.0  
129.5  
129.2  
129.0  
128.6  
128.5  
128.5  
128.5  
128.3  
128.2  
128.0  
127.7  
127.1  
126.5  
126.3  
125.9  
125.8  
125.8  
125.7  
120.6  
120.5  
120.5  
120.2  
120.1  
119.7  
119.3

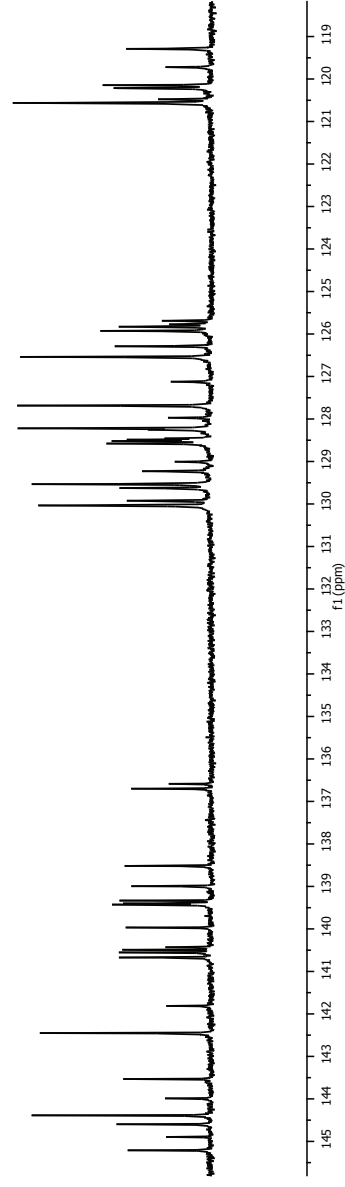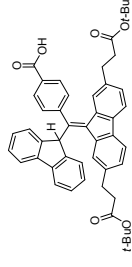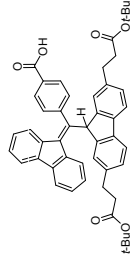

80.7  
80.7  
80.4

172.5  
172.4  
172.3  
171.6  
171.5

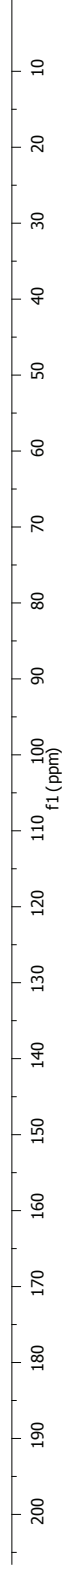

Compound 4 <sup>1</sup>H-NMR

CD<sub>3</sub>OD, 500 MHz

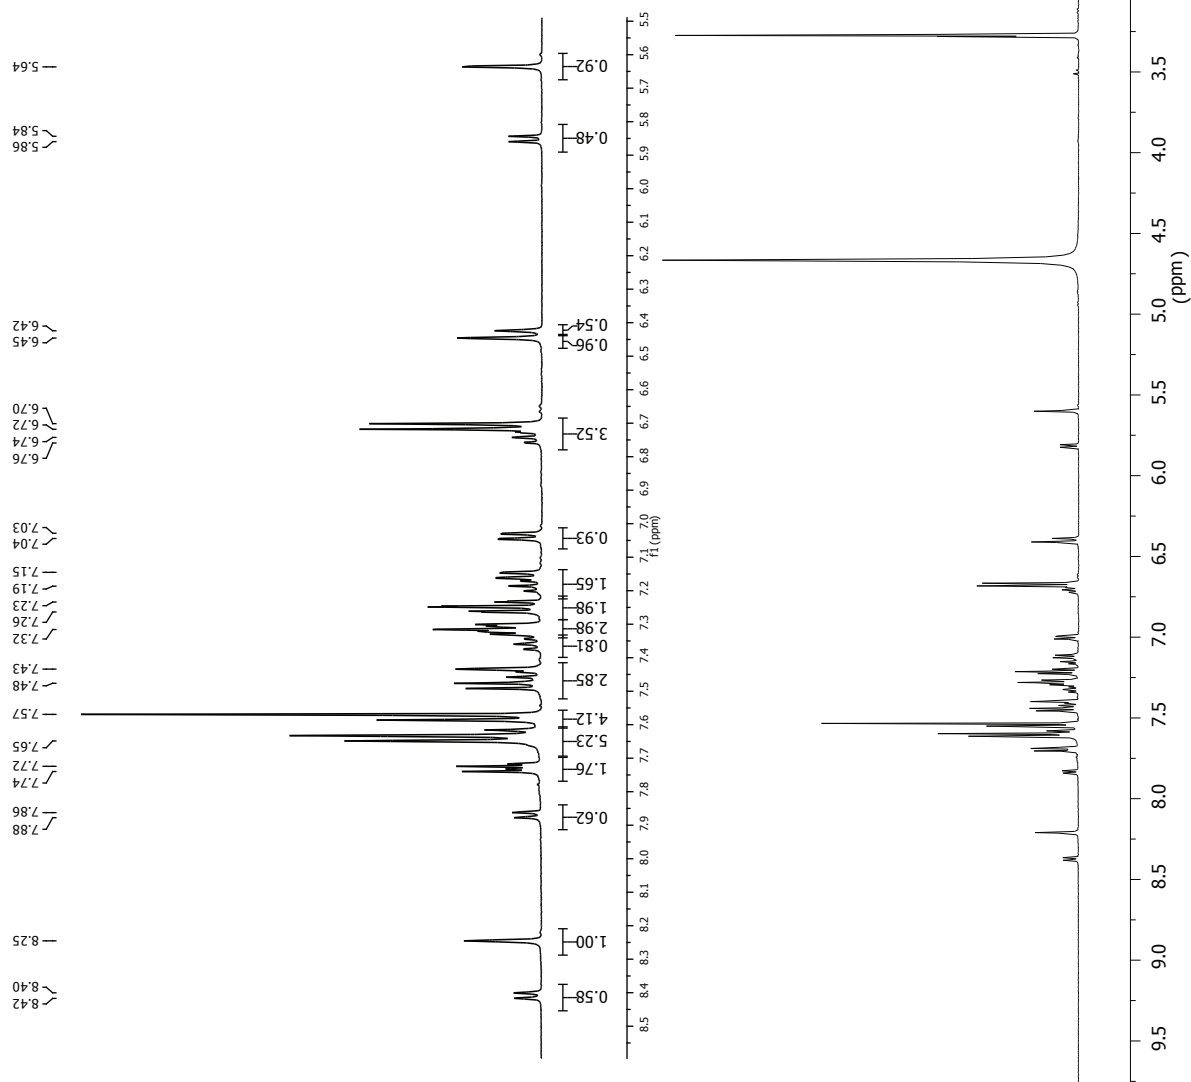

Compound 4 <sup>1</sup>H-NMR (con't.) and g-COSY 2D-NMR  
 CD<sub>3</sub>OD, 500 MHz

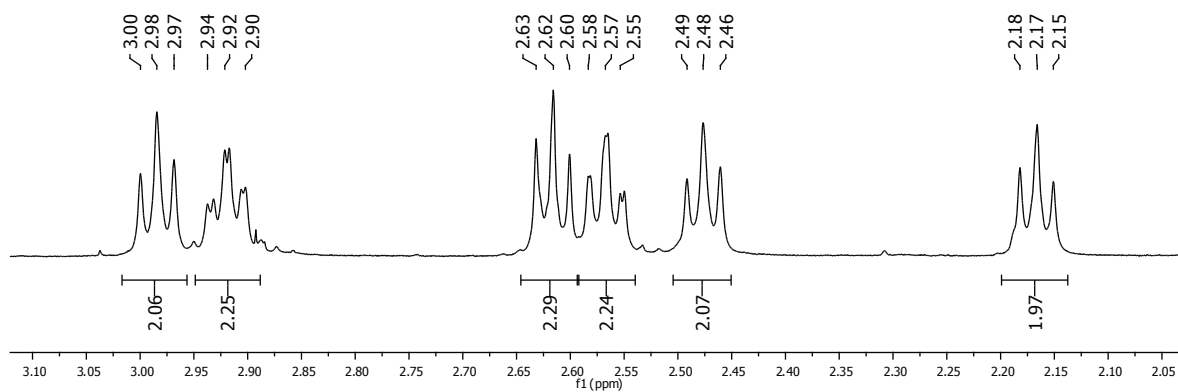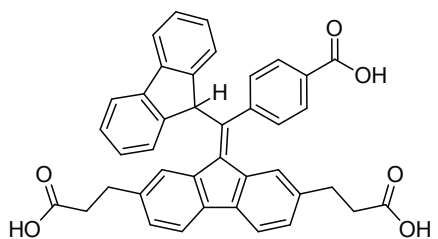

Integration of 1H = 1.00

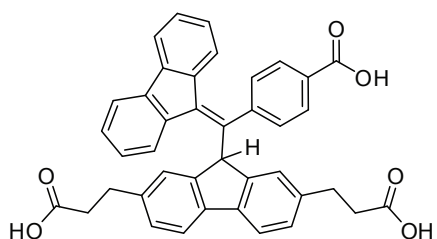

Integration of 1H = 0.50

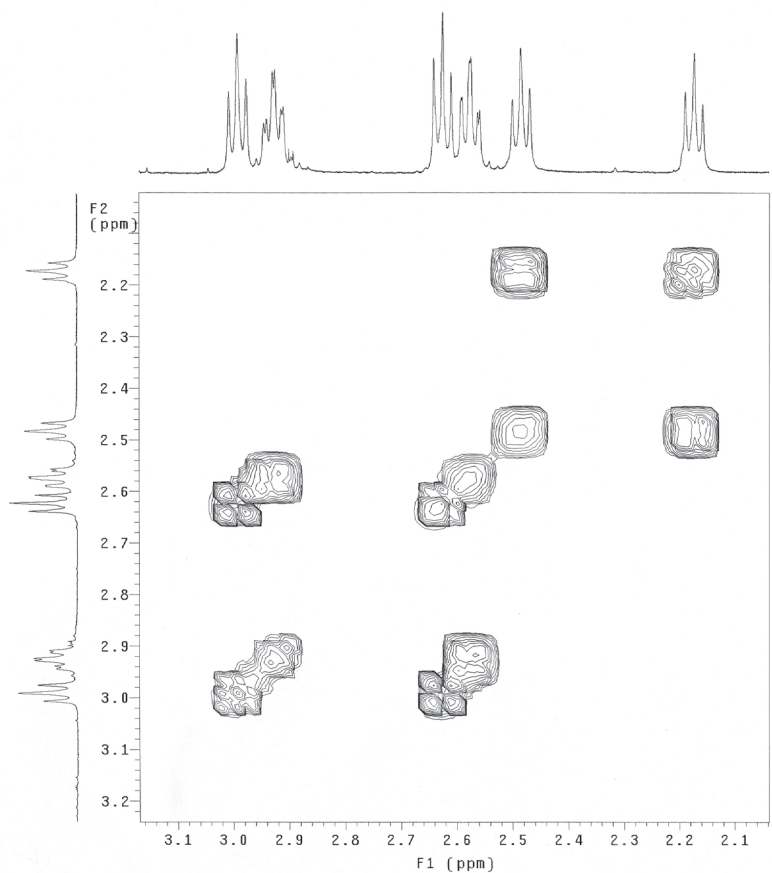

Compound 4 g-COSY 2D-NMR  
CD<sub>3</sub>OD, 500 MHz

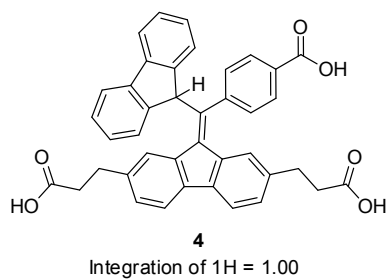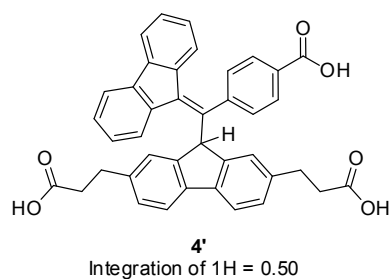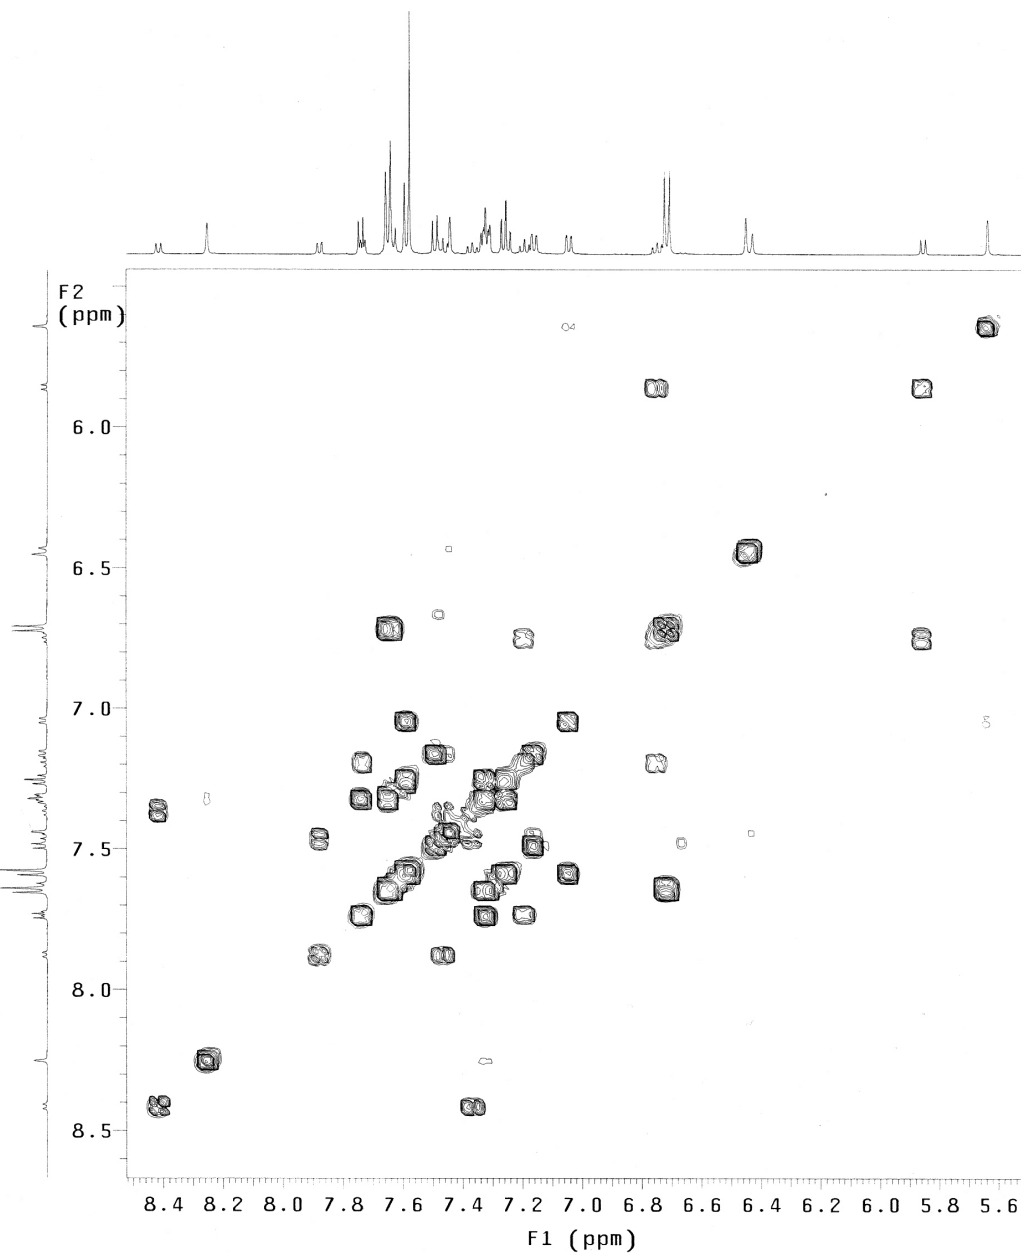

Compound 4 <sup>13</sup>C-NMR

CD<sub>3</sub>OD/CDCl<sub>3</sub>, 126 MHz

31.6  
31.8  
32.2  
35.8  
36.8  
36.9

53.0  
53.1

119.6  
119.9  
120.5  
120.7  
120.7

125.7  
125.9  
126.0  
126.5  
127.2  
127.8  
128.4  
129.2  
129.3  
129.5  
129.6  
129.8

136.7  
136.8  
138.9  
139.2  
139.4  
139.7  
140.4  
140.4  
140.9  
142.1  
142.8  
144.0  
144.2  
144.3  
144.6  
144.9

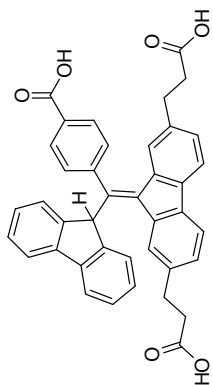

Integration of 1H = 1.00

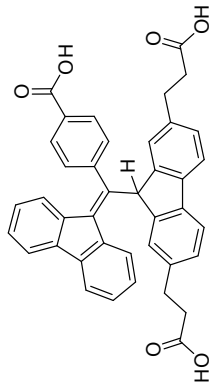

Integration of 1H = 0.50

176.3  
176.1  
175.8  
169.7

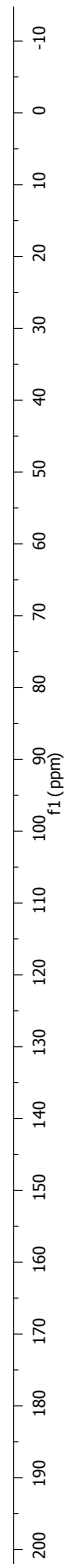

WS-BDPA <sup>1</sup>H-NMR  
CD<sub>3</sub>OD, 500 MHz

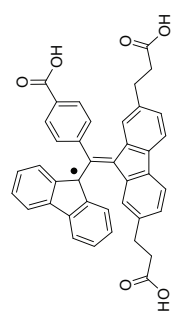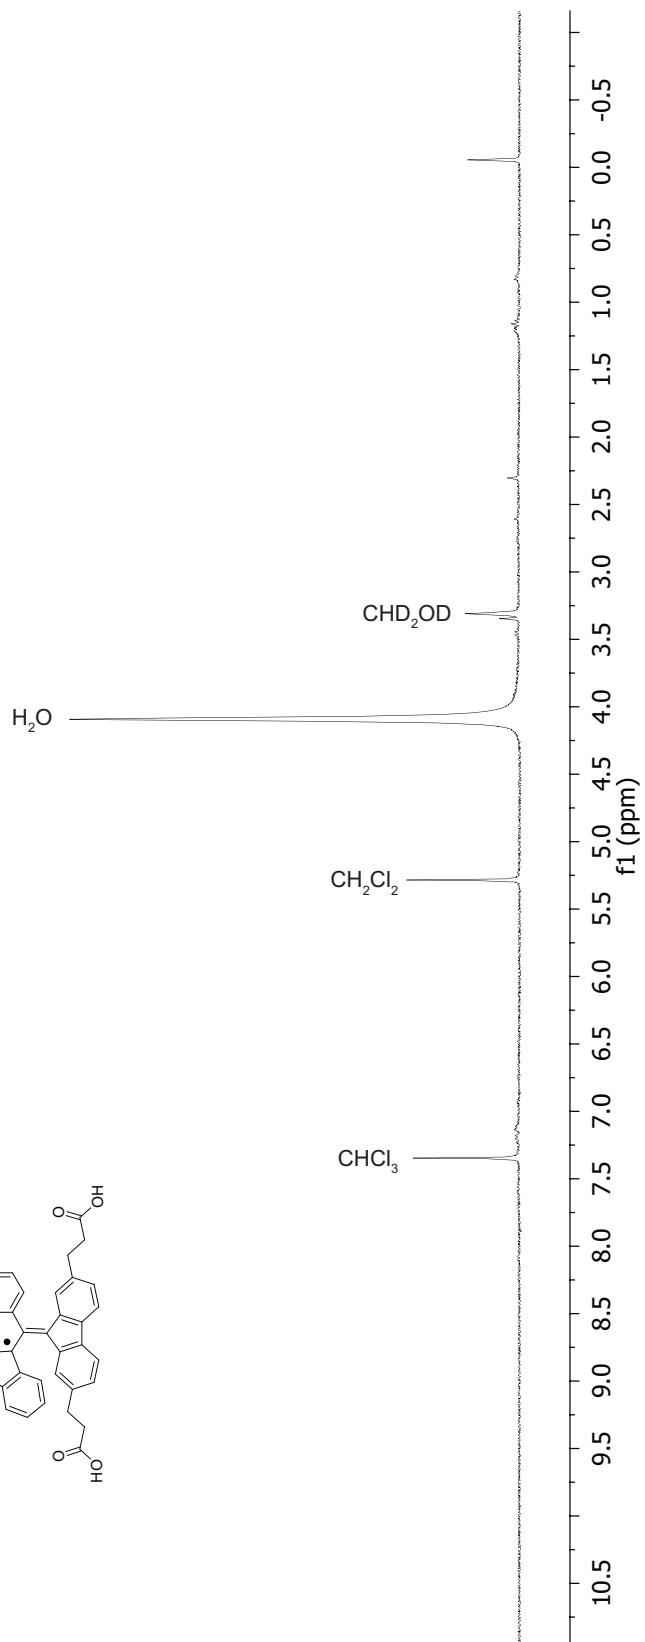

Supplement: NIHMS199943-supplement-1_si_001.pdf [file NIHMS199943-supplement-1_si_001.pdf]
